# Supplementary material for: Analysis of Antimicrobial Resistance Genes (ARGs) in Enterobacterales and A. baumannii Clinical Strains Colonizing a Single Italian Patient
Source: MDPI journal article supplement (doi:10.3390/antibiotics12030439), 2023-02-23
Supplement: s1 [file s1]

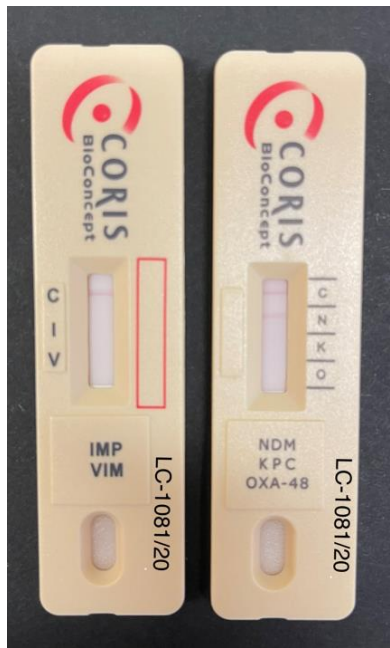

*Proteus mirabilis* RS

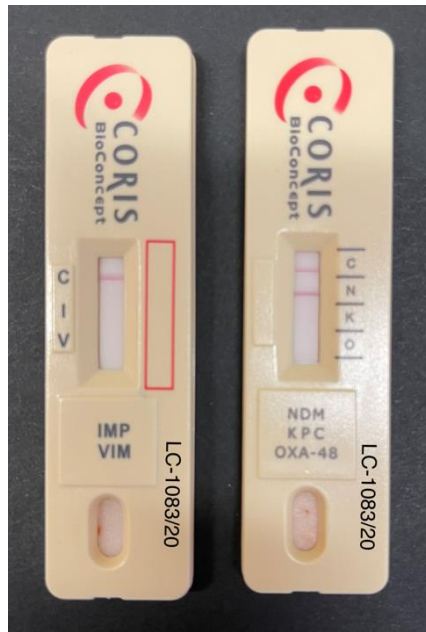

*Klebsiella pneumoniae* RS

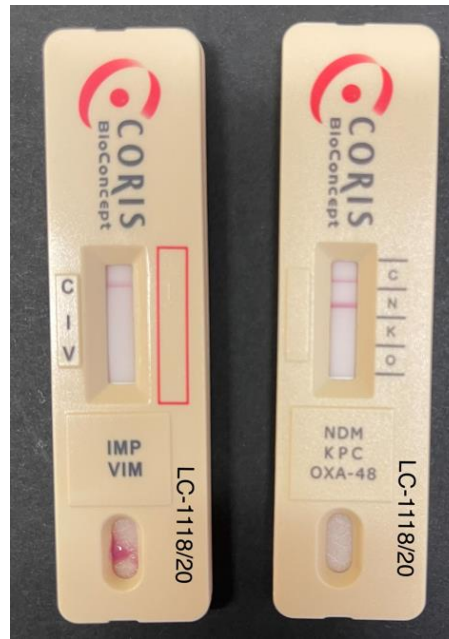

*Enterobacter cloacae* SW

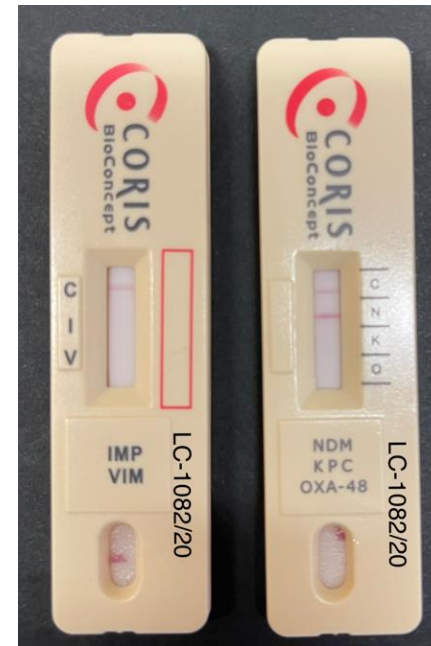

*Enterobacter cloacae* RS

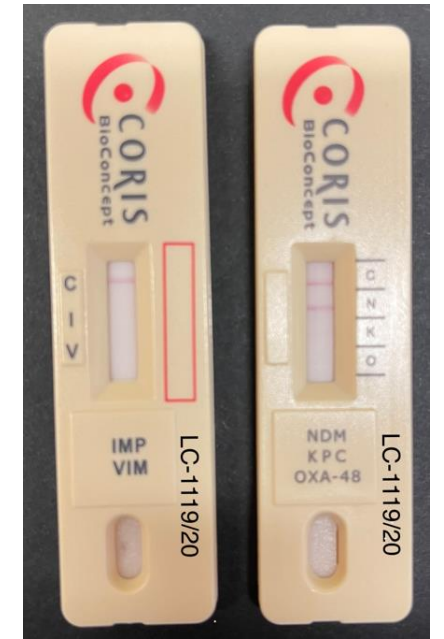

*Proteus mirabilis* SW

Figure S1. (a) Immunocromatographic test RESIST-4 O.K.N.V.I. (Coris BioConcept) to detect the presence of metallo- $\beta$ -lactamases (MBLs)

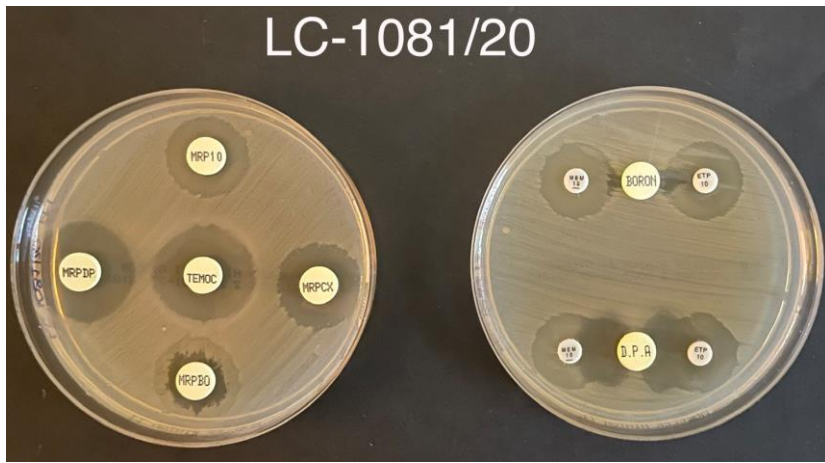

*Proteus mirabilis* RS

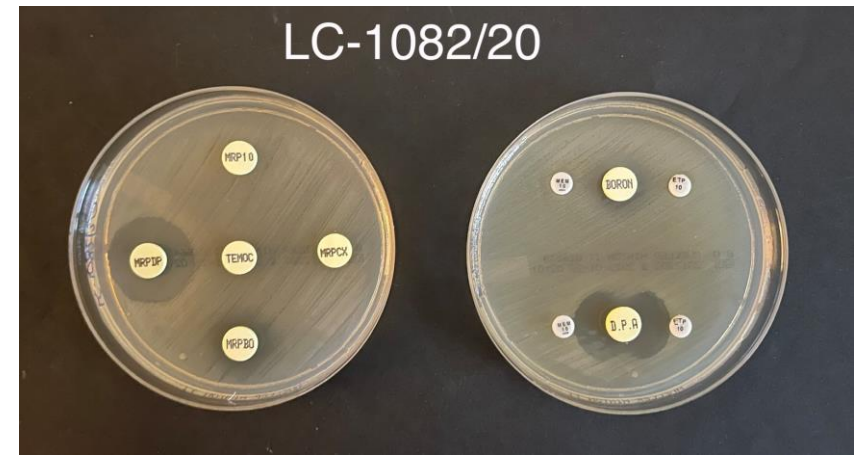

*Enterobacter cloacae* RS

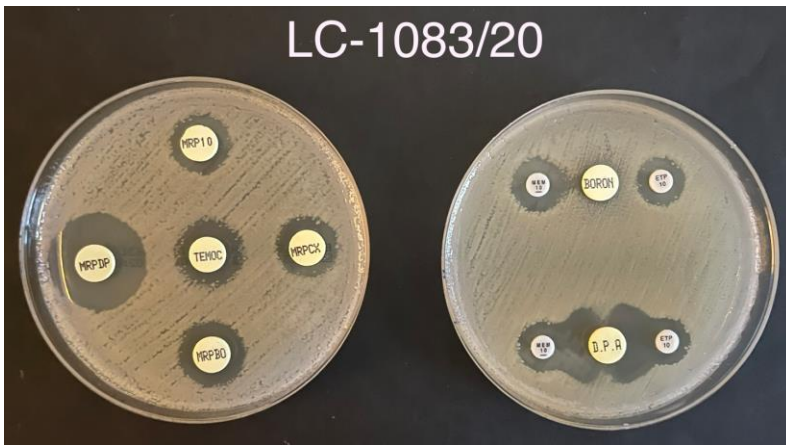

*Klebsiella pneumoniae* RS

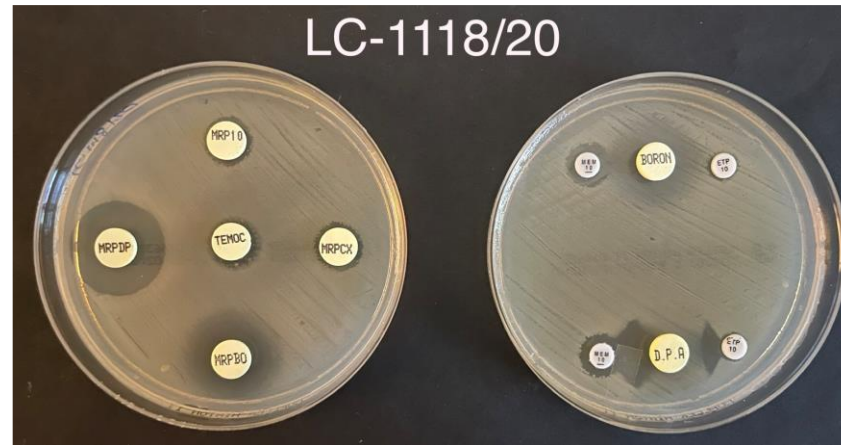

*Enterobacter cloacae* SW

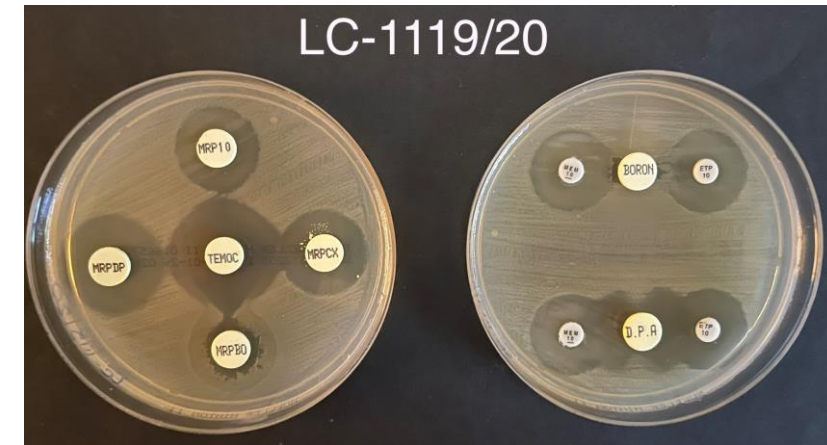

*Proteus mirabilis* SW

Figure S1. (b) Phenotypically evaluation was performed on the basis of synergistic activity between meropenem and dipicolinic acid using both the double disk approximation test (Rosco Diagnostica A/S, Taastrup, Denmark) and a commercially available combination method (KPC + MBL Confirm ID Kit; Rosco Diagnostica A/S).
